# Supplementary material
Source: MDPI journal article supplement (https://www.mdpi.com/2306-5338/8/2/78)
Supplement: s1 [file s1]

**Efficiency from a priori parameters**

calibration record length

1946-1963

| id       | bias       | rsq        | rmse       |
|----------|------------|------------|------------|
| 02192000 | -0.4827765 | 0.90858884 | 0.63993979 |
| 02202000 | -23.811472 | 0.83081152 | 0.54659358 |
| 02217500 | 0.52108206 | 0.87654273 | 0.78230079 |
| 02218500 | -2.5028036 | 0.8810284  | 0.64104972 |
| 02219500 | -1.2562316 | 0.8690552  | 0.83379597 |
| 02228000 | -9.0930547 | 0.8332577  | 0.56787561 |
| 02329000 | 2.58567633 | 0.87838977 | 0.48442698 |
| 02347500 | -0.7099999 | 0.92010298 | 0.64921087 |
| 02349500 | -17.103702 | 0.87936608 | 0.6293552  |

| NS         | Efficiency from a priori parameters | bias       | rsq        | rmse       | NS         |
|------------|-------------------------------------|------------|------------|------------|------------|
| 0.82552155 | validation record length            | 3.0646431  | 0.9090167  | 0.71226298 | 0.82569402 |
| 0.59482678 | 1964-2000                           | -5.1810419 | 0.84285373 | 0.59828039 | 0.66799554 |
| 0.76770659 |                                     | 2.92984931 | 0.89175362 | 0.80120156 | 0.79471861 |
| 0.77586793 |                                     | 11.7023398 | 0.83779248 | 32.8138499 | 0.55470453 |
| 0.75482405 |                                     | 20.346697  | 0.83411031 | 33.2785575 | 0.54179582 |
| 0.68274919 |                                     | -17.709646 | 0.8513285  | 0.71194087 | 0.68367527 |
| 0.7625569  |                                     | 8.43129941 | 0.84843901 | 0.89117095 | 0.6926038  |
| 0.84144698 |                                     | 0.41361576 | 0.91454049 | 0.7126148  | 0.83292967 |
| 0.74050441 |                                     | -5.2898292 | 0.88073608 | 0.64505428 | 0.77239213 |

**Efficiency from calibrated parameters**

calibration record length

1946-1963

| bias       | rsq        | rmse       | NS         |
|------------|------------|------------|------------|
| -0.4405187 | 0.92719773 | 0.57417245 | 0.85954142 |
| -14.535685 | 0.91022787 | 0.3781403  | 0.80608223 |
| 1.02971863 | 0.89539402 | 0.72427011 | 0.80089119 |
| -11.136576 | 0.90974279 | 0.57849677 | 0.81747496 |
| -2.7633361 | 0.90919786 | 0.7021054  | 0.82615472 |
| -8.6569568 | 0.88396011 | 0.49017607 | 0.76362555 |
| 1.01486589 | 0.89632804 | 0.44480635 | 0.79980885 |
| -7.6082747 | 0.93542374 | 0.58498137 | 0.87126785 |
| -8.9213196 | 0.90998392 | 0.53715304 | 0.8109684  |

**Efficiency from calibrated parameters**

validation record length

1964-2000

| bias       | rsq        | rmse       | NS         |
|------------|------------|------------|------------|
| 3.62656536 | 0.91574991 | 0.68685641 | 0.8379073  |
| -2.544628  | 0.83442656 | 0.58729095 | 0.68008029 |
| 3.93538356 | 0.89341387 | 0.79640494 | 0.7971692  |
| 8.80020092 | 0.84328532 | 32.3495553 | 0.56721666 |
| 22.5067432 | 0.83197542 | 33.7025309 | 0.53004628 |
| -19.147501 | 0.86258388 | 0.69663562 | 0.69712973 |
| -6.8944134 | 0.84641002 | 0.87174    | 0.7058625  |
| 1.9589851  | 0.90560742 | 0.74822782 | 0.81581369 |
| -3.3432311 | 0.8975345  | 0.60021378 | 0.80293628 |
